# Supplementary material for: Association of chromosomal aberrations in chromosomes 3 and 7, and P16 mutations with malignancy in salivary gland tumors
Source: PeerJ. 2025 Mar 31;13:e19217. doi: 10.7717/peerj.19217 (PMC11967423; doi:10.7717/peerj.19217)
Supplement: Supplemental Information 2 — The red mark represents positive cases. [file peerj-13-19217-s002.xlsx]

## Sheet: Sheet1
	abnormal signal points of CSP3	assessment	abnormal signal points of GSP P16	assessment	abnormal signal points of CSP7	assessment	pathological diagnosis
1	2	-	14	-	4	-	Mucoepidermoid Carcinoma
2	16	+	34	+	12	+	Mucoepidermoid Carcinoma
3	18	+	62	+	8	-	Mucoepidermoid Carcinoma
4	64	+	38	+	34	+	Mucoepidermoid Carcinoma
5	20	+	36	+	20	+	Mucoepidermoid Carcinoma
6	38	+	6	-	40	-	Mucoepidermoid Carcinoma
7	0	-	76	+	0	-	Mucoepidermoid Carcinoma
8	10	+	38	+	11	+	Mucoepidermoid Carcinoma
9	22	+	82	+	25	+	Mucoepidermoid Carcinoma
10	26	+	32	+	7	-	Mucoepidermoid Carcinoma
11	2	-	42	+	2	-	Mucoepidermoid Carcinoma
12	24	+	20	+	4	-	Mucoepidermoid Carcinoma
13	2	-	28	+	2	-	Mucoepidermoid Carcinoma
14	10	+	56	+	4	-	Mucoepidermoid Carcinoma
15	36	+	38	+	27	+	Adenoid Cystic Carcinoma
16	32	+	46	+	8	-	Mucoepidermoid Carcinoma
17	10	+	10	-	7	-	Mucoepidermoid Carcinoma
18	14	+	12	-	5	-	Mucoepidermoid Carcinoma
19	10	+	36	+	5	-	Mucoepidermoid Carcinoma
20	14	+	46	+	6	-	Mucoepidermoid Carcinoma
21	18	+	72	+	18	+	Mucoepidermoid Carcinoma
22	4	-	12	-	4	-	Salivary Duct Carcinoma
23	6	-	2	-	6	-	Pleomorphic Adenoma
24	4	-	0	-	4	-	Pleomorphic Adenoma
25	6	-	6	-	6	-	Pleomorphic Adenoma
26	10	+	38	+	4	-	Pleomorphic Adenoma
27	9	-	19	-	9	-	Pleomorphic Adenoma
28	5	-	17	-	5	-	Pleomorphic Adenoma
29	44	+	4	-	8	-	Pleomorphic Adenoma
30	2	-	6	-	2	-	Warthin's tumor
31	0	-	9	-	0	-	Pleomorphic Adenoma
32	1	-	15	-	10	+	Warthin's tumor
33	1	-	14	-	1	-	Warthin's tumor
34	6	-	6	-	6	-	Warthin's tumor
