# Supplementary material for: Association of chromosomal aberrations in chromosomes 3 and 7, and P16 mutations with malignancy in salivary gland tumors
Source: PeerJ. 2025 Mar 31;13:e19217. doi: 10.7717/peerj.19217 (PMC11967423; doi:10.7717/peerj.19217)
Supplement: Supplemental Information 3 — The red mark represents positive cases. [file peerj-13-19217-s003.xlsx]

## Sheet: Sheet1
	cell count	green fluorescence		red fluorescence		pathological diagnosis	classification(1 = malignant salivary gland tumor, 0 = benign salivary gland tumor/normal tissue)
		abnormal signal points of CSP3	assessment	abnormal signal points of GSP P16	assessment
1	100	2	-	14	-	Mucoepidermoid Carcinoma	1
2	100	16	+	34	+	Mucoepidermoid Carcinoma	1
3	100	18	+	62	+	Mucoepidermoid Carcinoma	1
4	100	64	+	38	+	Mucoepidermoid Carcinoma	1
5	100	20	+	36	+	Mucoepidermoid Carcinoma	1
6	100	38	+	6	-	Mucoepidermoid Carcinoma	1
7	100	0	-	76	+	Mucoepidermoid Carcinoma	1
8	100	10	+	38	+	Mucoepidermoid Carcinoma	1
9	100	22	+	82	+	Mucoepidermoid Carcinoma	1
10	100	26	+	32	+	Mucoepidermoid Carcinoma	1
11	100	2	-	42	+	Mucoepidermoid Carcinoma	1
12	100	24	+	20	+	Mucoepidermoid Carcinoma	1
13	100	2	-	28	+	Mucoepidermoid Carcinoma	1
14	100	10	+	56	+	Mucoepidermoid Carcinoma	1
15	100	32	+	46	+	Mucoepidermoid Carcinoma	1
16	100	10	+	10	-	Mucoepidermoid Carcinoma	1
17	100	14	+	12	-	Mucoepidermoid Carcinoma	1
18	100	10	+	36	+	Mucoepidermoid Carcinoma	1
19	100	30	+	46	+	Mucoepidermoid Carcinoma	1
20	100	34	+	72	+	Mucoepidermoid Carcinoma	1
21	100	36	+	38	+	Adenoid Cystic Carcinoma	1
22	100	2	-	27	+	Adenoid Cystic Carcinoma	1
23	100	3	-	10	-	Adenoid Cystic Carcinoma	1
24	100	6	-	22	+	Adenoid Cystic Carcinoma	1
25	100	26	+	29	+	Adenoid Cystic Carcinoma	1
26	100	1	-	20	+	Adenoid Cystic Carcinoma	1
27	100	20	+	40	+	Adenoid Cystic Carcinoma	1
28	100	3	-	24	+	Adenoid Cystic Carcinoma	1
29	100	11	+	18	-	Adenoid Cystic Carcinoma	1
30	100	1	-	42	+	Adenoid Cystic Carcinoma	1
31	100	5	-	28	+	Adenoid Cystic Carcinoma	1
32	100	10	+	18	-	Adenoid Cystic Carcinoma	1
33	100	1	-	8	-	Adenoid Cystic Carcinoma	1
34	100	17	+	23	+	squamous cell carcinoma	1
35	100	8	-	22	+	squamous cell carcinoma	1
36	100	14	+	20	+	squamous cell carcinoma	1
37	100	13	+	25	+	squamous cell carcinoma	1
38	100	64	+	68	+	squamous cell carcinoma	1
39	100	31	+	53	+	squamous cell carcinoma	1
40	100	4	-	12	-	Salivary Duct Carcinoma	1
41	100	7	-	28	+	Salivary Duct Carcinoma	1
42	100	10	+	17	-	myoepithelial carcinoma	1
43	100	1	-	23	+	myoepithelial carcinoma	1
44	100	11	+	33	+	secretory carcinoma	1
45	100	0	-	0	-	Pleomorphic Adenoma	0
46	100	6	-	2	-	Pleomorphic Adenoma	0
47	100	4	-	0	-	Pleomorphic Adenoma	0
48	100	2	-	6	-	Pleomorphic Adenoma	0
49	100	6	-	6	-	Pleomorphic Adenoma	0
50	100	10	+	38	+	Pleomorphic Adenoma	0
51	100	9	-	19	-	Pleomorphic Adenoma	0
52	100	5	-	17	-	Pleomorphic Adenoma	0
53	100	5	-	16	-	Pleomorphic Adenoma	0
54	100	8	-	18	-	Pleomorphic Adenoma	0
55	100	9	-	36	+	Pleomorphic Adenoma	0
56	100	26	+	37	+	Pleomorphic Adenoma	0
57	100	12	+	22	+	Pleomorphic Adenoma	0
58	100	0	-	18	-	Pleomorphic Adenoma	0
59	100	7	-	17	-	Pleomorphic Adenoma	0
60	100	3	-	14	-	Pleomorphic Adenoma	0
61	100	3	-	18	-	Pleomorphic Adenoma	0
62	100	3	-	26	+	Pleomorphic Adenoma	0
63	100	0	-	9	-	Pleomorphic Adenoma	0
64	100	7	-	13	-	Warthin's tumor	0
65	100	2	-	19	-	Warthin's tumor	0
66	100	13	+	27	+	Warthin's tumor	0
67	100	0	-	14	-	Warthin's tumor	0
68	100	6	-	15	-	Warthin's tumor	0
69	100	6	-	15	-	Warthin's tumor	0
70	100	2	-	6	-	Warthin's tumor	0
71	100	1	-	15	-	Warthin's tumor	0
72	100	1	-	14	-	Warthin's tumor	0
73	100	6	-	6	-	Warthin's tumor	0
74	100	0	-	12	-	Warthin's tumor	0
75	100	0	-	2	-	lipoma	0
76	100	26	+	22	+	ameloblastoma	0
77	100	0	-	5	-	basal cell adenoma	0
78	100	3	-	13	-	normal salivary gland tissue	0
79	100	4	-	2	-	normal salivary gland tissue	0
80	100	2	-	0	-	normal salivary gland tissue	0
81	100	6	-	4	-	benign salivary gland tissue	0
82	100	6	-	4	-	benign salivary gland tissue	0
83	100	6	-	8	-	normal salivary gland tissue	0
84	100	2	-	6	-	normal salivary gland tissue	0
85	100	2	-	6	-	normal salivary gland tissue	0
86	100	8	-	12	-	benign salivary gland tissue	0
