# Supplementary material for: Association of chromosomal aberrations in chromosomes 3 and 7, and P16 mutations with malignancy in salivary gland tumors
Source: PeerJ. 2025 Mar 31;13:e19217. doi: 10.7717/peerj.19217 (PMC11967423; doi:10.7717/peerj.19217)
Supplement: Supplemental Information 4 — The collected clinical samples along with the corresponding clinical data including tumor histological type, location, patient age, and diagnosis time. [file peerj-13-19217-s004.xlsx]

## Sheet: Sheet1
Clinical data of salivary gland tumor cases
Sample ID	Gender	Age	Tumor Site	Submission Date	Pathological Result	Classification(1 = Malignant, 0 = Benign/Normal)
1	female	30	Left parotid gland	2021-11-23	Mucoepidermoid Carcinoma	1
2	female	63	Left parotid gland	2021-11-10	Mucoepidermoid Carcinoma	1
3	male	51	Left parotid gland	2021-11-11	Mucoepidermoid Carcinoma	1
4	female	79	Right main bronchus mass	2021-12-27	Mucoepidermoid Carcinoma	1
5	female	25	Right parotid gland mass	2022-04-02	Mucoepidermoid Carcinoma	1
6	female	54	Mass at the base of the tongue	2022-06-21	Mucoepidermoid Carcinoma	1
7	male	40	Left parotid gland	2023-01-30	Mucoepidermoid Carcinoma	1
8	male	17	Left main bronchus mass	2021-12-08	Mucoepidermoid Carcinoma	1
9	male	86	Left neck mass	2022-10-13	Mucoepidermoid Carcinoma	1
10	female	26	Right neck mass	2023-02-17	Mucoepidermoid Carcinoma	1
11	female	58	Left maxillary bone mass	2021-06-15	Mucoepidermoid Carcinoma	1
12	female	36	Right sublingual gland mass	2023-04-28	Mucoepidermoid Carcinoma	1
13	female	9	Tracheal neoplasm	2022-01-11	Mucoepidermoid Carcinoma	1
14	female	62	Base of the tongue	2022-04-19	Mucoepidermoid Carcinoma	1
15	female	32	Right sublingual gland mass	2023-01-03	Mucoepidermoid Carcinoma	1
16	female	29	Right parotid gland superficial and deep lobe masses	2022-05-26	Mucoepidermoid Carcinoma	1
17	female	8	Right buccal mass	2022-07-12	Mucoepidermoid Carcinoma	1
18	female	55	Right parotid gland mass	2022-10-13	Mucoepidermoid Carcinoma	1
19	male	47	Left parotid gland superficial lobe mass	2021-08-12	Mucoepidermoid Carcinoma	1
20	male	74	Right vocal cord	2021-12-15	Mucoepidermoid Carcinoma	1
21	male	63	Brain mass	2022-06-23	Adenoid Cystic Carcinoma	1
22	female	39	Left parotid gland	2021-07-27	Adenoid Cystic Carcinoma	1
23	male	37	Left buccal mucosa	2023-03-21	Adenoid Cystic Carcinoma	1
24	male	65	Right maxillary sinus	2023-04-27	Adenoid Cystic Carcinoma	1
25	male	71	Palate mass	2023-07-21	Adenoid Cystic Carcinoma	1
26	female	25	Left parotid gland mass	2023-07-27	Adenoid Cystic Carcinoma	1
27	male	49	Left neck level Ib lymph nodes and submandibular gland	2023-07-11	Adenoid Cystic Carcinoma	1
28	female	50	Left parotid salivary gland mass	2021-10-15	Adenoid Cystic Carcinoma	1
29	male	37	Left palate	2023-03-13	Adenoid Cystic Carcinoma	1
30	female	77	Right submandibular, right inner mandible	2021-09-06	Adenoid Cystic Carcinoma	1
31	male	70	Left upper palate	2021-09-14	Adenoid Cystic Carcinoma	1
32	female	69	Left submandibular gland mass	2022-07-19	Adenoid Cystic Carcinoma	1
33	female	69	Mass on the body of the tongue	2022-07-20	Adenoid Cystic Carcinoma	1
34	male	78	Right mandible mass	2023-03-31	squamous cell carcinoma	1
35	male	69	Tongue	2023-03-17	squamous cell carcinoma	1
36	male	57	Left tip of the tongue	2023-06-25	squamous cell carcinoma	1
37	male	39	Right buccal mass	2023-06-20	squamous cell carcinoma	1
38	male	50	Right neck level I	2023-08-07	squamous cell carcinoma	1
39	male	80	Left neck level IIa	2023-06-14	squamous cell carcinoma	1
40	male	60	Right submental mass	2023-03-14	Salivary Duct Carcinoma	1
41	male	64	Left submandibular gland	2021-09-01	Salivary Duct Carcinoma	1
42	male	39	Mandible	2021-07-19	myoepithelial carcinoma	1
43	female	55	Left palate mass	2022-11-25	myoepithelial carcinoma	1
44	female	32	Right parotid gland mass and lymph nodes	2023-02-21	secretory carcinoma	1
45	male	68	Left upper palate mass	2023-04-21	Pleomorphic Adenoma	0
46	male	42	Left submandibular mass	2015-10-26	Pleomorphic Adenoma	0
47	male	47	Right earlobe mass	2012-02-15	Pleomorphic Adenoma	0
48	female	40	Parotid gland mass	2012-10-26	Pleomorphic Adenoma	0
49	female	40	Parotid gland mass	2012-10-26	Pleomorphic Adenoma	0
50	female	43	Right parotid gland mass	2023-04-18	Pleomorphic Adenoma	0
51	female	26	Left submandibular gland mass	2023-06-06	Pleomorphic Adenoma	0
52	female	52	Right parapharyngeal mass	2023-07-24	Pleomorphic Adenoma	0
53	female	52	Right parapharyngeal mass	2023-07-24	Pleomorphic Adenoma	0
54	female	82	Left submandibular gland mass	2023-08-14	Pleomorphic Adenoma	0
55	female	82	Left submandibular gland mass	2023-08-14	Pleomorphic Adenoma	0
56	male	59	Left submandibular gland mass	2023-02-24	Pleomorphic Adenoma	0
57	male	24	Left parotid gland superficial lobe and mass	2023-05-30	Pleomorphic Adenoma	0
58	male	23	Right parotid gland mass	2023-02-24	Pleomorphic Adenoma	0
59	male	53	Right palate mass	2023-02-03	Pleomorphic Adenoma	0
60	female	21	Left submandibular gland mass	2023-02-27	Pleomorphic Adenoma	0
61	male	15	Right parotid gland mass	2023-08-04	Pleomorphic Adenoma	0
62	female	40	Right parotid gland mass and superficial lobe	2023-07-18	Pleomorphic Adenoma	0
63	male	48	Left mandible mass	2023-07-26	Pleomorphic Adenoma	0
64	male	84	Left parotid gland mass	2023-03-16	Warthin's tumor	0
65	male	65	Right parotid gland superficial lobe	2023-07-13	Warthin's tumor	0
66	male	59	Right parotid gland superficial lobe + mass	2023-08-02	Warthin's tumor	0
67	male	65	Left parotid gland and mass	2023-08-11	Warthin's tumor	0
68	male	39	Left parotid gland	2023-07-26	Warthin's tumor	0
69	male	39	Left parotid gland	2023-07-26	Warthin's tumor	0
70	male	70	Bilateral parotid gland masses	2023-04-17	Warthin's tumor	0
71	male	54	Right parotid gland deep lobe mass, right parotid gland superficial lobe mass	2023-07-13	Warthin's tumor	0
72	male	55	Left parotid gland mass	2023-06-29	Warthin's tumor	0
73	male	57	Right deep neck mass	2023-04-19	Warthin's tumor	0
74	male	56	Right parotid gland mass	2023-07-21	Warthin's tumor	0
75	female	60	Left mandible	2023-05-08	lipoma	0
76	male	41	Left mandible bone mass	2023-02-07	ameloblastoma	0
77	male	50	Right parotid gland vicinity	2021-07-20	basal cell adenoma	0
78	female	51	Right submandibular gland	2023-07-11	normal salivary gland tissue	0
79	female	67	Tongue	2023-02-14	normal salivary gland tissue	0
80	female	67	Tongue	2023-02-14	normal salivary gland tissue	0
81	male	12	Left parotid gland superficial lobe	2023-03-30	benign salivary gland tissue	0
82	female	20	Left sublingual gland mass	2023-03-29	benign salivary gland tissue	0
83	male	54	Left side of the tongue	2023-02-10	normal salivary gland tissue	0
84	female	64	Right parotid gland and mass	2023-04-24	normal salivary gland tissue	0
85	female	64	Right parotid gland and mass	2023-04-24	normal salivary gland tissue	0
86	female	26	Right neck mass	2023-03-21	benign salivary gland tissue	0
